# Supplementary material for: Factors influencing student choice of a degree in physiotherapy: a population-based study in Catalonia (Spain)
Source: PeerJ journal article supplement (doi:10.7717/peerj.10991), 2021-04-01
Supplement: Form_Eng.pdf [file Form_Eng.pdf]

# ACADEMIC AND WORK-RELATED MOTIVATIONS OF PHYSIOTHERAPY FIRST YEAR STUDENTS IN CATALONIA

Please, read the following questions and provide your answers by marking the appropriate check box with a letter X. You are kindly requested to **choose only one answer per question**, except where stated otherwise.

## ❖ DEMOGRAPHIC DATA.-

Are you a man or a woman?  M  W

Please, state your age here:

- **Have you studied at university before?**  Yes  No (if no, please go to the question on **Origin**)  
**In which field were your university studies?**  Health care  Physical activity  Other: \_\_\_\_\_  
**Did you obtain the official Degree/Diploma for your university studies?**  Yes  No
- **Origin**
  - I usually live in Spain and I did not have to move away from home, in order to study here.
  - I usually live in Spain, but in order to study here I had to move out of my city.
  - I usually live abroad. I moved to a different country in order to study. Specify your country: \_\_\_\_\_
- **What was the main reason why you moved away?** (If you did not move, move on to the next question)
  - There are no Physiotherapy studies available in my area.
  - I tried to enter Physiotherapy studies in my area, but I did not make it.
  - I did not try to apply in my area. I preferred to directly move away.
  - Other. Please specify \_\_\_\_\_
- **Do you work as well as study?** Please choose the option that best suits your personal situation.
  - I just study.
  - I study and I work.
- **Who is responsible for the payment of your study-related expenses?**
  - I pay for it myself.
  - My parent/s or someone in my close environment pays for it.
  - I have a scholarship/grant. **Specify what type:**  studies/tuition only  studies and other expenses
  - I asked for a bank loan, and I will have to pay the credit back later on.
- **Rate your level of Spanish language (1=minimum. 5=maximum):** 1 - 2 - 3 - 4 - 5
- **Rate your level of Catalan language (1=minimum. 5=maximum):** 1 - 2 - 3 - 4 - 5
- **Rate your level of English language (1=minimum. 5=maximum):** 1 - 2 - 3 - 4 - 5

## ❖ MOTIVATION TO BECOME A PHYSIOTHERAPIST.

Please specify TO WHAT EXTENT the following factors have influenced your decision to become a physiotherapist.

**I have wanted to be a physiotherapist since I was a child.**

Not at all  Slightly  Somewhat  Very much  Extremely

**I wish to work with my hands.**

Not at all  Slightly  Somewhat  Very much  Extremely

**I chose Physiotherapy because a friend of mine studies it. That way we can be together.**

Not at all  Slightly  Somewhat  Very much  Extremely

**I know some physiotherapists who I admire and I would like to be like them.**

Not at all  Slightly  Somewhat  Very much  Extremely

**It is a profession that helps other people.**

Not at all  Slightly  Somewhat  Very much  Extremely

**I chose it because I am interested in sciences.**

Not at all  Slightly  Somewhat  Very much  Extremely

**I chose Physiotherapy because someone recommended that I do so.**

Not at all  Slightly  Somewhat  Very much  Extremely

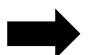

**I chose Physiotherapy because I could not access my preferred course of study.**

Not at all       Slightly       Somewhat       Very much       Extremely

**I chose Physiotherapy because I consider it to be an easy major/degree.**

Not at all       Slightly       Somewhat       Very much       Extremely

**Unemployment rates to this profession are low.**

Not at all       Slightly       Somewhat       Very much       Extremely

**Physiotherapists make good money.**

Not at all       Slightly       Somewhat       Very much       Extremely

**There are many work possibilities/choices and they offer a lot of freedom.**

Not at all       Slightly       Somewhat       Very much       Extremely

**Physiotherapists are highly respected in society.**

Not at all       Slightly       Somewhat       Very much       Extremely

**These studies complement my previous education or job position well.**

Not at all       Slightly       Somewhat       Very much       Extremely

**Physiotherapists are closely related to the sports world.**

Not at all       Slightly       Somewhat       Very much       Extremely

**❖ AFTER YOUR STUDIES:**

▪ **Do you plan on following any of these programmes?** – You may mark one or more options.

Another degree    Master’s    Doctorate    Osteopathy    I don’t know    Other (specify) \_\_\_\_\_

▪ **In which country do you plan to work?** Pick only one answer.

- In my home country.
- In another country (please, specify) \_\_\_\_\_
- I don’t know.

▪ **Which tasks would you like to carry out in the future?** Choose one or multiple answers.

- Teaching/Research.
- Management/Administration/Marketing.
- Treating patients directly (clinical practice).
- I don’t know.

▪ **How would you like to carry out your future profession?** Choose only one answer.

- Working for my own company (self-employed).
- Working for someone else’s company (employee).
- Work for my own company and also as an employee in someone else’s company.
- Work for public institutions (public servant).
- I don’t know.

**❖ PHYSIOTHERAPY KNOWLEDGE:**

**Use the dotted line to write about the different HEALTH CARE BRANCHES where you think a physiotherapist can work.** .....

.....  
.....  
.....

**Use the dotted line to write about the DIFFERENT PLACES OR TYPES OF WORK CENTRES a physiotherapist can work in.** .....

.....  
.....  
.....

**THANK YOU VERY MUCH FOR YOUR PARTICIPATION!**
